# Supplementary material for: A porphyrin-conjugated TiO2/CoFe2O4 nanostructure photocatalyst for the selective production of aldehydes under visible light
Source: Royal Society of Chemistry journal article supplement (doi:10.1039/d0nj06272c), 2021-01-01
Supplement: d0nj06272c1.pdf [file d0nj06272c1.pdf]

## Supplementary information

### Porphyrin-conjugated $\text{TiO}_2/\text{CoFe}_2\text{O}_4$ nanostructure photocatalyst for selective production of aldehydes by visible-light

Mahdieh Ghobadifard,<sup>a,b,c</sup> Elham Safaei,<sup>a</sup> Pavle V. Radovanovic,<sup>b</sup> Sajjad Mohebbi<sup>\* a, c</sup>

<sup>a</sup> Department of Chemistry, University of Kurdistan, Sanandaj, 66177-15175, Iran

<sup>b</sup> Department of Chemistry, University of Waterloo, 200 University Ave. W., Waterloo, ON, Canada

<sup>c</sup> Research Center for Nanotechnology, University of Kurdistan, Sanandaj, 66177-15175, Iran  
smohebbi@uok.ac.ir, Fax: +98(87)336660075, Tel: +98(87)33624133

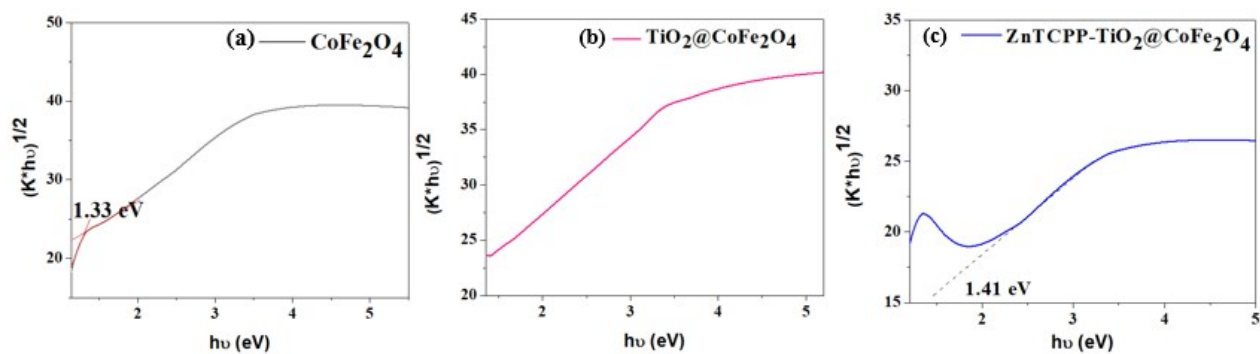

Fig. 1S. The absorption edge for bandgap determination: (a)  $\text{CoFe}_2\text{O}_4$ , (b)  $\text{TiO}_2/\text{CoFe}_2\text{O}_4$ , (c)  $\text{ZnTCPP-TiO}_2/\text{CoFe}_2\text{O}_4$  nano hybrid.
